# Supplementary material for: A current insight into the drug–drug molecular adducts of an anti-cancer drug vandetanib with various NSAIDs
Source: Royal Society of Chemistry journal article supplement (doi:10.1039/d5ce00070j), 2025-01-01
Supplement: d5ce00070j1.pdf [file d5ce00070j1.pdf]

## A current insight into the drug-drug molecular adducts of an anti-cancer drug Vandetanib with various NSAIDs

K G Abishek,<sup>a</sup> Gowtham Kenguva,<sup>a</sup> Lopamudra Giri,<sup>\*b</sup> E. V. Venkat Shivaji Ramarao,<sup>c</sup> Gorja Dhilli Rao,<sup>d</sup> Rambabu Dandela<sup>\*a</sup>

<sup>a</sup>Department of Industrial and Engineering Chemistry, Institute of Chemical Technology-Indian Oil Odisha Campus, Bhubaneswar, India. E-mail: r.dandela@iocb.ictmumbai.edu.in

<sup>b</sup>Department of Chemistry, Odisha University of Technology and Research, (Formerly CET), Bhubaneswar, India. E-mail: [lopamudra7giri@gmail.com](mailto:lopamudra7giri@gmail.com)

<sup>c</sup>Dr Reddy's Institute of Life Sciences, University of Hyderabad Campus, Gachibowli, Hyderabad 500 046, India

<sup>d</sup>MLR Institute of Technology, Laxman Reddy Avenue, Dundigal, Hyderabad, Telangana 500043

| Contents                                                                                                                                                       | Page No |
|----------------------------------------------------------------------------------------------------------------------------------------------------------------|---------|
| <b>Figure S1.</b> ORTEP view of (a) VDTB.IBU and (b) VDTB.MEF. Herein, the ellipsoids are drawn with a 50% probability.                                        | 01      |
| <b>Table S1.</b> Crystallographic table of VDTB salts                                                                                                          | 02      |
| <b>Table S2:</b> Hydrogen bond geometry of molecular salts of VDTB                                                                                             | 03      |
| <b>Figure S2.</b> Hirshfield Surface analysis 3-D maps and 2-D fingerprints of VDTB and its salts VDTB.MEF and VDTB-IBU.                                       | 03      |
| <b>Figure S3.</b> Comparison of PXRD Overlay for the 1:1 VDTB-NSAIDs Ground Combination (LAG) with Its Initial Components Before and After Solubility Analysis | 04      |
| <b>Figure S4 and Table S3&amp;S4.</b> Linearity graphs for dissolution and solubility studies of VDTB salts in pH 7.0 medium.                                  | 04-05   |

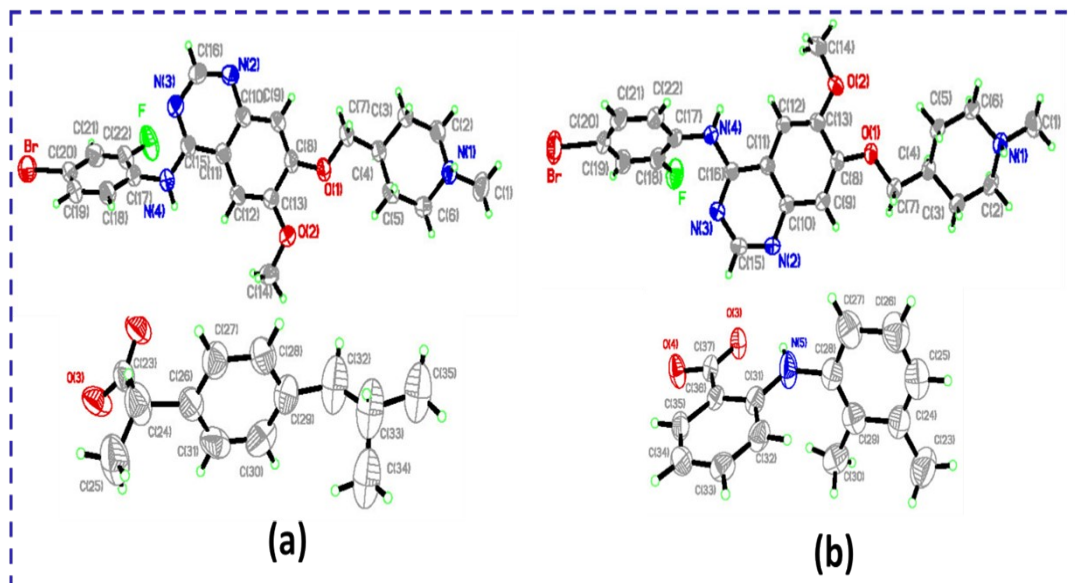

**Figure S1.** ORTEP view of (a) VDTB.IBU and (b) VDTB.MEF. Herein, the ellipsoids are drawn with a 50% probability.

| Parameter                               | VDTB.IBU                                                         | VDTB.MEF                                                         |
|-----------------------------------------|------------------------------------------------------------------|------------------------------------------------------------------|
| Formula                                 | C <sub>35</sub> H <sub>42</sub> BrFN <sub>4</sub> O <sub>4</sub> | C <sub>37</sub> H <sub>39</sub> BrFN <sub>5</sub> O <sub>4</sub> |
| M <sub>r</sub>                          | 681.63                                                           | 716.64                                                           |
| crystal shape                           | Block                                                            | Block                                                            |
| crystal colour                          | Colourless                                                       | Colourless                                                       |
| crystal system                          | Triclinic                                                        | Triclinic                                                        |
| space group                             | $P\bar{1}$                                                       | $P\bar{1}$                                                       |
| T, K                                    | 298.15                                                           | 298.15                                                           |
| $\lambda(\text{Mo-K}\alpha)/\text{\AA}$ | 0.71073                                                          | 0.71073                                                          |
| a/\AA                                   | 10.192(3)                                                        | 12.7596(10)                                                      |
| b/\AA                                   | 13.023(4)                                                        | 12.7738(10)                                                      |
| c/\AA                                   | 13.452(4)                                                        | 13.1770(11)                                                      |
| $\alpha/^\circ$                         | 94.774(8)                                                        | 110.597(2)                                                       |
| $\beta/^\circ$                          | 105.146(8)                                                       | 90.033(2)                                                        |
| $\gamma/^\circ$                         | 94.739(7)                                                        | 118.704(2)                                                       |
| V/\AA <sup>3</sup>                      | 1707.4(9)                                                        | 1725.4(2)                                                        |
| Z                                       | 2                                                                | 2                                                                |
| D <sub>c</sub> / g cm <sup>-3</sup>     | 1.326                                                            | 1.379                                                            |
| $\mu$ , mm <sup>-1</sup>                | 1.252                                                            | 1.244                                                            |
| 2 $\theta$ range [°]                    | 2.25 - 27.59                                                     | 2.23 - 27.54                                                     |
| limiting indices                        | -13 ≤ h ≤ 13<br>-16 ≤ k ≤ 16<br>-16 ≤ l ≤ 17                     | -16 ≤ h ≤ 16<br>-16 ≤ k ≤ 16<br>-17 ≤ l ≤ 17                     |
| F (000)                                 | 712.0                                                            | 744                                                              |
| Total reflections                       | 54637                                                            | 33222                                                            |
| Unique reflections                      | 7898                                                             | 7912                                                             |
| Reflection at I > 2σ (I)                | 4753                                                             | 5068                                                             |
| No. Of parameters                       | 393                                                              | 437                                                              |
| R <sub>1</sub> , I > 2σ (I)             | 0.0643                                                           | 0.0643                                                           |
| wR <sub>2</sub> , I > 2σ (I)            | 0.1809                                                           | 0.1377                                                           |
| GoF on F <sup>2</sup>                   | 1.026                                                            | 1.009                                                            |
| CCDC No.                                | 2358466                                                          | 2358467                                                          |

**Table S1.** Crystallographic table of VDTB salts

| Name of the compound | $D-H\cdots A$                  | $D-H(\text{\AA})$ | $H\cdots A(\text{\AA})$ | $D-A(\text{\AA})$ | $D-H\cdots A(^{\circ})$ |
|----------------------|--------------------------------|-------------------|-------------------------|-------------------|-------------------------|
| VDTB.IBU             | $N1^{+}-H1\cdots O3^{-}$       | 0.980             | 1.661                   | 2.635(4)          | 170                     |
|                      | $N4-H4\cdots O4$               | 0.860             | 1.921                   | 2.765(4)          | 165                     |
|                      | $C12-H12\cdots O4^i$           | 0.930             | 2.401                   | 3.273(1)          | 151                     |
| VDTB.MEF             | $N1^{+}-H1\cdots O4^{-ii}$     | 0.980             | 1.621                   | 2.592(3)          | 168                     |
|                      | $N5-H5\cdots O3(\text{Intra})$ | 0.860             | 2.020                   | 2.680(3)          | 132                     |
|                      | $N4-H4\cdots O3$               | 0.860             | 1.993                   | 2.932(5)          | 143                     |
|                      | $C12-H12\cdots O3$             | 0.930             | 2.521                   | 3.275(4)          | 138                     |
|                      | $C1-H1C\cdots F^{iii}$         | 0.960             | 2.562                   | 3.110(5)          | 122                     |

Symmetry Codes: (i) x, y-1, z; (ii) x+1, y+1, z; (iii) -x+1, -y, -z+1.

**Table 2.** Hydrogen bond distances ( $\text{\AA}$ ) and angles ( $^{\circ}$ ) of the molecular complexes of VDTB.

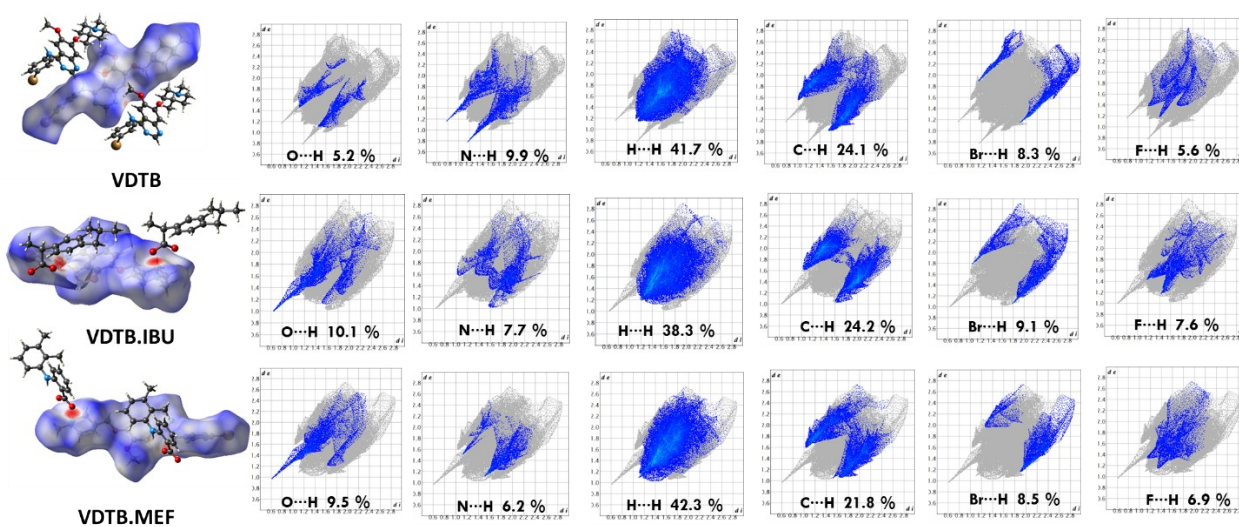

**Figure S2.** Hirshfeld Surface analysis 3-D maps and 2-D fingerprints of VDTB and its salts VDTB.MEF and VDTB.IBU.

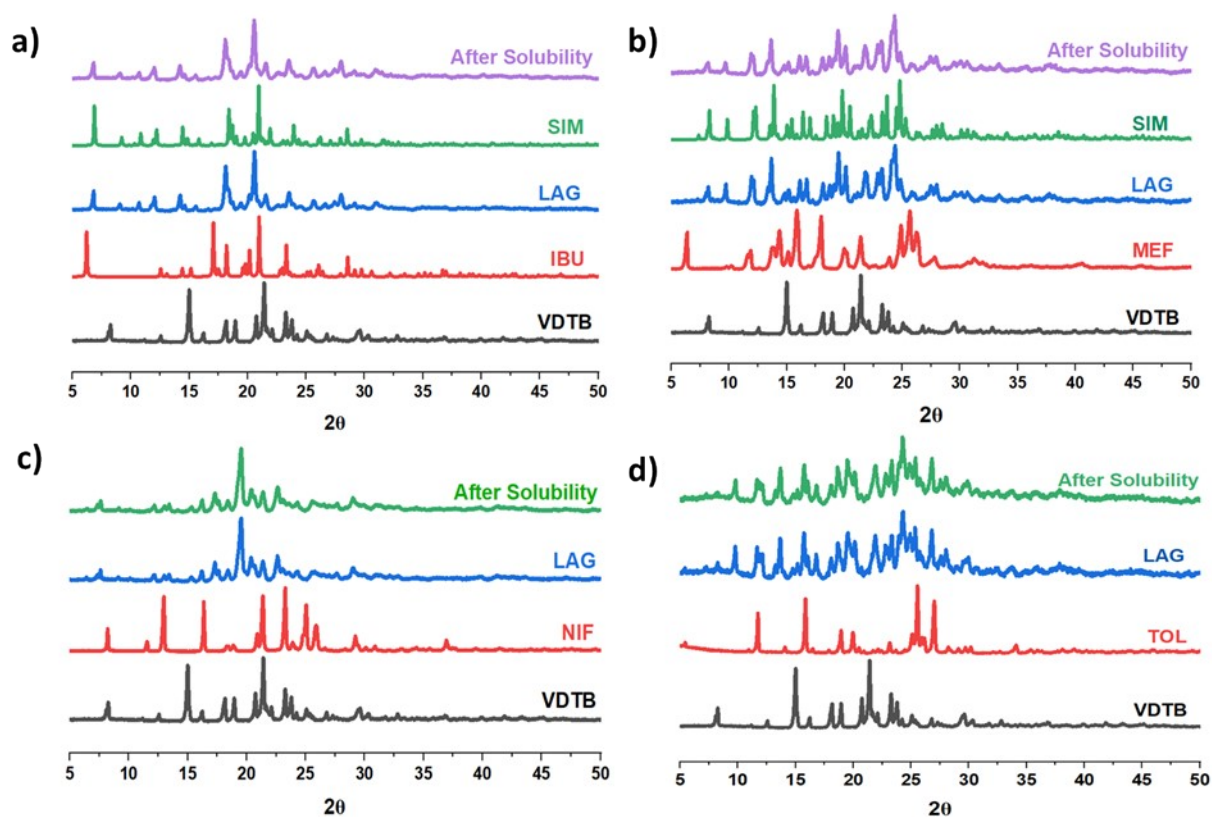

**Figure S3.** A comparison between the PXRD overlay of a 1:1 VDTB-NSAIDs ground combination (LAG) and its initial components.

### Method development for determination of Vandetanib

For method development, the perfect quantification of VDTB was achieved using a mobile phase consisting of acetonitrile, water, and orthophosphoric acid (90:8:2 v/v/v). Such composition gave a distinct chromatographic peak with excellent resolution, a clear baseline separation, and a low tailing factor. Therefore, on this basis, this mobile phase and method of ionization were finally accepted because they gave the best peak shape, resolution and performance of the method for the quantification of VDTB. An optimum flow rate is the one that minimizes solvent consumption while allowing for a fast run time. A flow rate of 1.0 ml/min was found to be effective in this study. This ensured successful elution of the analyte with good separation and reliable performance. Lambda max was determined to be 248 nm, at a retention time (RT) of 2.94 minutes corresponding to the elution of VDTB.

### Calibration curve

| Concentration | Average Area under the curve |
|---------------|------------------------------|
| 10            | 5.2103                       |
| 20            | 12.7637                      |
| 30            | 17.7232                      |
| 40            | 23.7651                      |
| 50            | 30.9261                      |

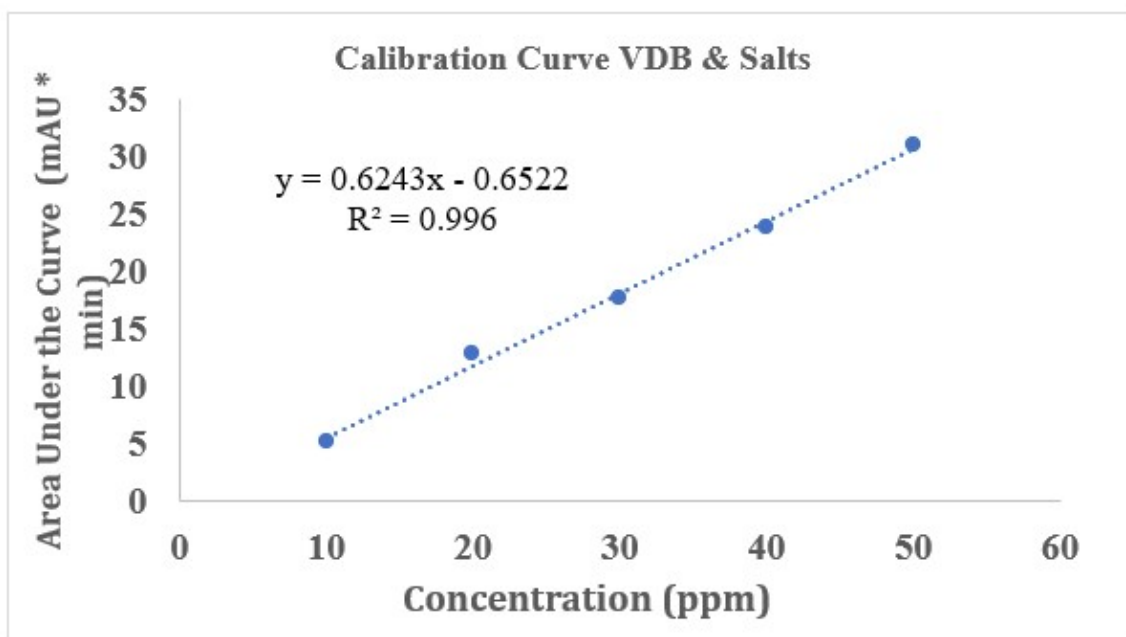

Figure S4.

| Sample    | First | Second | Third | Average | SD   |
|-----------|-------|--------|-------|---------|------|
| Pure VDTB | 14.36 | 13.96  | 15.06 | 14.46   | 0.56 |
| VDTB_MEF  | 21.53 | 22.82  | 23.05 | 22.47   | 0.82 |
| VDTB_NIF  | 37.13 | 36.92  | 41.01 | 38.35   | 2.30 |
| VDTB_IBU  | 79.24 | 76.86  | 75.24 | 77.11   | 2.01 |
| VDTB_TOL  | 4.92  | 5.37   | 7.44  | 5.91    | 1.34 |

Table S3

| Time (minutes) | Pure VDTB | VDTB_MEF | VDTB_NIF | VDTB_IBU | VDTB_TOL |
|----------------|-----------|----------|----------|----------|----------|
| 15             | 0.68      | 1.05     | 1.80     | 3.61     | 0.28     |
| 30             | 1.32      | 2.06     | 3.51     | 7.05     | 0.54     |
| 45             | 1.94      | 3.01     | 5.14     | 10.34    | 0.79     |
| 60             | 2.52      | 3.92     | 6.70     | 13.46    | 1.03     |
| 90             | 3.62      | 5.62     | 9.59     | 19.29    | 1.48     |
| 120            | 4.61      | 7.16     | 12.22    | 24.58    | 1.88     |
| 150            | 5.51      | 8.56     | 14.61    | 29.38    | 2.25     |
| 180            | 6.33      | 9.83     | 16.78    | 33.75    | 2.59     |
| 240            | 7.75      | 12.04    | 20.55    | 41.32    | 3.17     |
| 360            | 9.89      | 15.36    | 26.22    | 52.73    | 4.04     |
| 720            | 13.01     | 20.22    | 34.52    | 69.40    | 5.32     |

**Table S4**

**Figure S4 and Table S3&S4.** Linearity graphs for solubility and dissolution studies of VDTB salts in pH 7.0 medium.
